# Supplementary material
Source: PubMed Central journal article supplement (PMC4535055)
Supplement: peds.2012-2072_peds.2012-2072SupplementaryData.pdf [file peds.2012-2072_peds.2012-2072SupplementaryData.pdf]

# Supplemental Information

## Appendix A: AMPATH Pediatric Clinical Encounter Form

|                                                                                                                                                                                                                                                                                                                                                                                                                                                                                                                                                                                                                                                                                                                                                                                                                                                                                                                                                                                                                                                                                                                                                                                                                                                                                                                                                                                                                                                                                               |  | PAEDIATRIC RETURN VISIT FORM                                                                                                                                                                                                                                                                                                                                                                                                                                                                                                                                                                                                                                                                                                   |  | Date: / /                                                                                                                                                                                                                                                                                                                                                                                                                                                                                 |
|--------------------------------------------------------------------------------------------------------------------------------------------------------------------------------------------------------------------------------------------------------------------------------------------------------------------------------------------------------------------------------------------------------------------------------------------------------------------------------------------------------------------------------------------------------------------------------------------------------------------------------------------------------------------------------------------------------------------------------------------------------------------------------------------------------------------------------------------------------------------------------------------------------------------------------------------------------------------------------------------------------------------------------------------------------------------------------------------------------------------------------------------------------------------------------------------------------------------------------------------------------------------------------------------------------------------------------------------------------------------------------------------------------------------------------------------------------------------------------------------------------------------------------------------------------------------------------|--|--------------------------------------------------------------------------------------------------------------------------------------------------------------------------------------------------------------------------------------------------------------------------------------------------------------------------------------------------------------------------------------------------------------------------------------------------------------------------------------------------------------------------------------------------------------------------------------------------------------------------------------------------------------------------------------------------------------------------------|--|-------------------------------------------------------------------------------------------------------------------------------------------------------------------------------------------------------------------------------------------------------------------------------------------------------------------------------------------------------------------------------------------------------------------------------------------------------------------------------------------|
| 1. Name:                                                                                                                                                                                                                                                                                                                                                                                                                                                                                                                                                                                                                                                                                                                                                                                                                                                                                                                                                                                                                                                                                                                                                                                                                                                                                                                                                                                                                                                                                                                                                                       |  | AMPATH ID:                                                                                                                                                                                                                                                                                                                                                                                                                                                                                                                                                                                                                                                                                                                     |  | Previous ID:                                                                                                                                                                                                                                                                                                                                                                                                                                                                              |
| 2. DOB: / /                                                                                                                                                                                                                                                                                                                                                                                                                                                                                                                                                                                                                                                                                                                                                                                                                                                                                                                                                                                                                                                                                                                                                                                                                                                                                                                                                                                                                                                                                                                                                                    |  | Age: Yrs. Mos.                                                                                                                                                                                                                                                                                                                                                                                                                                                                                                                                                                                                                                                                                                                 |  | Mother's AMPATH ID                                                                                                                                                                                                                                                                                                                                                                                                                                                                        |
| 3. Mother Deceased: <input type="checkbox"/> Yes <input type="checkbox"/> No <input type="checkbox"/> Unknown<br>Father deceased: <input type="checkbox"/> Yes <input type="checkbox"/> No <input type="checkbox"/> Unknown                                                                                                                                                                                                                                                                                                                                                                                                                                                                                                                                                                                                                                                                                                                                                                                                                                                                                                                                                                                                                                                                                                                                                                                                                                                                                                                                                    |  | 4. <input type="checkbox"/> Scheduled <input type="checkbox"/> Unscheduled Early <input type="checkbox"/> Unscheduled Late                                                                                                                                                                                                                                                                                                                                                                                                                                                                                                                                                                                                     |  |                                                                                                                                                                                                                                                                                                                                                                                                                                                                                           |
| 5. Clinic Location:<br>MTRH Module: <input type="checkbox"/> 1 <input type="checkbox"/> 2 <input type="checkbox"/> 3 <input type="checkbox"/> 4 Chulaimbo <input type="checkbox"/> 1 <input type="checkbox"/> 2 Busia <input type="checkbox"/> 1 <input type="checkbox"/> 2<br><input type="checkbox"/> Amukura <input type="checkbox"/> Burnt Forest <input type="checkbox"/> Iten <input type="checkbox"/> Kabarnet <input type="checkbox"/> Kapenguria <input type="checkbox"/> Turbo<br><input type="checkbox"/> Khunyangu <input type="checkbox"/> Kitale <input type="checkbox"/> Mosoriot <input type="checkbox"/> Mt. Elgon <input type="checkbox"/> Naitiri <input type="checkbox"/> Port Victoria <input type="checkbox"/> Teso<br><input type="checkbox"/> UG District Hospital <input type="checkbox"/> Webuye <input type="checkbox"/> Moi's Bridge <input type="checkbox"/> Moi University <input type="checkbox"/> Soy<br><input type="checkbox"/> Nambale <input type="checkbox"/> Mukhobola <input type="checkbox"/> Bumala A<br><input type="checkbox"/> Satellite: <input type="checkbox"/> Other:                                                                                                                                                                                                                                                                                                                                                                                                                                                          |  | 6. Category:<br><input type="checkbox"/> Pilot <input type="checkbox"/> MTCT Plus<br><input type="checkbox"/> NASCOP <input type="checkbox"/> Self Pay<br><input type="checkbox"/> Awaiting Assignment<br><input type="checkbox"/> Research <input type="checkbox"/> Other:                                                                                                                                                                                                                                                                                                                                                                                                                                                    |  | 7. Person Bringing Patient:<br><input type="checkbox"/> Mother <input type="checkbox"/> Father <input type="checkbox"/> Sibling<br><input type="checkbox"/> Grandparent <input type="checkbox"/> P <input type="checkbox"/> M<br><input type="checkbox"/> Auntie <input type="checkbox"/> P <input type="checkbox"/> M<br><input type="checkbox"/> Uncle <input type="checkbox"/> P <input type="checkbox"/> M<br><input type="checkbox"/> Children's home <input type="checkbox"/> Other |
| 8. Current Feeding: tick all that apply<br><input type="checkbox"/> Breast <input type="checkbox"/> Formula <input type="checkbox"/> Cow's/Animal milk<br><input type="checkbox"/> Expressed Breast milk <input type="checkbox"/> Other liquids<br><input type="checkbox"/> Water <input type="checkbox"/> Solid Food                                                                                                                                                                                                                                                                                                                                                                                                                                                                                                                                                                                                                                                                                                                                                                                                                                                                                                                                                                                                                                                                                                                                                                                                                                                          |  | 9. Previous Immunizations: <input type="checkbox"/> BCG<br><input type="checkbox"/> Hib Dose#: <input type="checkbox"/> 1 <input type="checkbox"/> 2 <input type="checkbox"/> 3 <input type="checkbox"/> Measles Dose#: <input type="checkbox"/> 1<br><input type="checkbox"/> HEP B Dose#: <input type="checkbox"/> 1 <input type="checkbox"/> 2 <input type="checkbox"/> 3 <input type="checkbox"/> Polio Dose#: <input type="checkbox"/> 1 <input type="checkbox"/> 2 <input type="checkbox"/> 3 <input type="checkbox"/> 4<br><input type="checkbox"/> DTP Dose#: <input type="checkbox"/> 1 <input type="checkbox"/> 2 <input type="checkbox"/> 3 <input type="checkbox"/> Completed all <input type="checkbox"/> Unknown |  |                                                                                                                                                                                                                                                                                                                                                                                                                                                                                           |
| 10. If breastfeeding, is mother on ARVs?<br><input type="checkbox"/> Yes <input type="checkbox"/> No <input type="checkbox"/> Unknown                                                                                                                                                                                                                                                                                                                                                                                                                                                                                                                                                                                                                                                                                                                                                                                                                                                                                                                                                                                                                                                                                                                                                                                                                                                                                                                                                                                                                                          |  | 11. Are there Siblings < 18 months? <input type="checkbox"/> Yes <input type="checkbox"/> No<br>If yes, are they registered in Pediatric HIV clinic? <input type="checkbox"/> Yes <input type="checkbox"/> No <input type="checkbox"/> Unknown<br>If yes AMPATH ID's: 1. _____ 2. _____                                                                                                                                                                                                                                                                                                                                                                                                                                        |  |                                                                                                                                                                                                                                                                                                                                                                                                                                                                                           |
| 12. Child's Current HIV Status: <input type="checkbox"/> HIV exposed, status indeterminate <input type="checkbox"/> HIV infected <input type="checkbox"/> HIV Negative                                                                                                                                                                                                                                                                                                                                                                                                                                                                                                                                                                                                                                                                                                                                                                                                                                                                                                                                                                                                                                                                                                                                                                                                                                                                                                                                                                                                         |  |                                                                                                                                                                                                                                                                                                                                                                                                                                                                                                                                                                                                                                                                                                                                |  |                                                                                                                                                                                                                                                                                                                                                                                                                                                                                           |
| 13. Has patient been hospitalized since last visit? <input type="checkbox"/> Yes <input type="checkbox"/> No Reason: _____                                                                                                                                                                                                                                                                                                                                                                                                                                                                                                                                                                                                                                                                                                                                                                                                                                                                                                                                                                                                                                                                                                                                                                                                                                                                                                                                                                                                                                                     |  |                                                                                                                                                                                                                                                                                                                                                                                                                                                                                                                                                                                                                                                                                                                                |  |                                                                                                                                                                                                                                                                                                                                                                                                                                                                                           |
| 14. Does Child have a disability? <input type="checkbox"/> Yes <input type="checkbox"/> No If yes, Specify: _____                                                                                                                                                                                                                                                                                                                                                                                                                                                                                                                                                                                                                                                                                                                                                                                                                                                                                                                                                                                                                                                                                                                                                                                                                                                                                                                                                                                                                                                              |  |                                                                                                                                                                                                                                                                                                                                                                                                                                                                                                                                                                                                                                                                                                                                |  |                                                                                                                                                                                                                                                                                                                                                                                                                                                                                           |
| 15. Current Medications:                                                                                                                                                                                                                                                                                                                                                                                                                                                                                                                                                                                                                                                                                                                                                                                                                                                                                                                                                                                                                                                                                                                                                                                                                                                                                                                                                                                                                                                                                                                                                       |  |                                                                                                                                                                                                                                                                                                                                                                                                                                                                                                                                                                                                                                                                                                                                |  |                                                                                                                                                                                                                                                                                                                                                                                                                                                                                           |
| 15a. ARVs: <input type="checkbox"/> Yes <input type="checkbox"/> No Is this the patient's Primary Regimen? <input type="checkbox"/> Yes <input type="checkbox"/> No Reason for ARV's: <input type="checkbox"/> pMTCT <input type="checkbox"/> Clinical disease<br><input type="checkbox"/> 3TC (4mg/kg): <input type="checkbox"/> Syrup _____ mg _____ ml <input type="checkbox"/> Tabs _____ mg <input type="checkbox"/> Kaletra (0.125ml/kg): <input type="checkbox"/> Syrup _____ mg _____ ml <input type="checkbox"/> Tabs _____ mg<br><input type="checkbox"/> d4T (1mg/kg): <input type="checkbox"/> Tabs _____ 15 <input type="checkbox"/> 20 <input type="checkbox"/> 30 mg <input type="checkbox"/> ABC (8mg/kg): <input type="checkbox"/> Syrup _____ mg _____ ml <input type="checkbox"/> Tabs _____ mg<br><input type="checkbox"/> AZT: (180mg/m2): <input type="checkbox"/> Syrup _____ mg _____ ml <input type="checkbox"/> Tabs _____ mg <input type="checkbox"/> DDI (100mg/m2): <input type="checkbox"/> Syrup _____ mg _____ ml <input type="checkbox"/> Tabs _____ mg<br><input type="checkbox"/> NVP: <input type="checkbox"/> Syrup _____ mg _____ ml <input type="checkbox"/> Tabs _____ mg <input type="checkbox"/> Nelfinavir: <input type="checkbox"/> Powder _____ mg <input type="checkbox"/> Tabs _____ mg<br><input type="checkbox"/> EFV: <input type="checkbox"/> Syrup _____ mg _____ ml <input type="checkbox"/> Tabs _____ mg <input type="checkbox"/> Other: <input type="checkbox"/> Syrup _____ ml <input type="checkbox"/> Tabs _____ mg |  |                                                                                                                                                                                                                                                                                                                                                                                                                                                                                                                                                                                                                                                                                                                                |  |                                                                                                                                                                                                                                                                                                                                                                                                                                                                                           |
| 15b. PCP Prophylaxis: <input type="checkbox"/> None <input type="checkbox"/> Septrin <input type="checkbox"/> Dapsone                                                                                                                                                                                                                                                                                                                                                                                                                                                                                                                                                                                                                                                                                                                                                                                                                                                                                                                                                                                                                                                                                                                                                                                                                                                                                                                                                                                                                                                          |  | 15c. TB Prophylaxis: <input type="checkbox"/> None <input type="checkbox"/> INH                                                                                                                                                                                                                                                                                                                                                                                                                                                                                                                                                                                                                                                |  |                                                                                                                                                                                                                                                                                                                                                                                                                                                                                           |
| 15d. TB Treatment: <input type="checkbox"/> None <input type="checkbox"/> Completed (Date: / / ) <input type="checkbox"/> Rifater <input type="checkbox"/> Rifinah (Rifampin/INH)<br><input type="checkbox"/> Rifampicin <input type="checkbox"/> INH <input type="checkbox"/> Pyrazinamide <input type="checkbox"/> Ethambutol <input type="checkbox"/> Streptomycin Start Date of TB treatment: / /                                                                                                                                                                                                                                                                                                                                                                                                                                                                                                                                                                                                                                                                                                                                                                                                                                                                                                                                                                                                                                                                                                                                                                          |  |                                                                                                                                                                                                                                                                                                                                                                                                                                                                                                                                                                                                                                                                                                                                |  |                                                                                                                                                                                                                                                                                                                                                                                                                                                                                           |
| 15e. Cryptococcus Tx: <input type="checkbox"/> None <input type="checkbox"/> Diflucan                                                                                                                                                                                                                                                                                                                                                                                                                                                                                                                                                                                                                                                                                                                                                                                                                                                                                                                                                                                                                                                                                                                                                                                                                                                                                                                                                                                                                                                                                          |  |                                                                                                                                                                                                                                                                                                                                                                                                                                                                                                                                                                                                                                                                                                                                |  |                                                                                                                                                                                                                                                                                                                                                                                                                                                                                           |
| 15f. Other Drugs: _____                                                                                                                                                                                                                                                                                                                                                                                                                                                                                                                                                                                                                                                                                                                                                                                                                                                                                                                                                                                                                                                                                                                                                                                                                                                                                                                                                                                                                                                                                                                                                        |  |                                                                                                                                                                                                                                                                                                                                                                                                                                                                                                                                                                                                                                                                                                                                |  |                                                                                                                                                                                                                                                                                                                                                                                                                                                                                           |
| 16. Adherence:                                                                                                                                                                                                                                                                                                                                                                                                                                                                                                                                                                                                                                                                                                                                                                                                                                                                                                                                                                                                                                                                                                                                                                                                                                                                                                                                                                                                                                                                                                                                                                 |  |                                                                                                                                                                                                                                                                                                                                                                                                                                                                                                                                                                                                                                                                                                                                |  |                                                                                                                                                                                                                                                                                                                                                                                                                                                                                           |
| 16a. Who has been giving the medicine to the patient? (Please tick all that apply):<br><input type="checkbox"/> Mother <input type="checkbox"/> Father <input type="checkbox"/> Sibling <input type="checkbox"/> Grandparent <input type="checkbox"/> Auntie <input type="checkbox"/> Uncle <input type="checkbox"/> Self <input type="checkbox"/> Children's Home <input type="checkbox"/> Other (Specify): _____                                                                                                                                                                                                                                                                                                                                                                                                                                                                                                                                                                                                                                                                                                                                                                                                                                                                                                                                                                                                                                                                                                                                                             |  |                                                                                                                                                                                                                                                                                                                                                                                                                                                                                                                                                                                                                                                                                                                                |  |                                                                                                                                                                                                                                                                                                                                                                                                                                                                                           |
| 16b. During the last month has the patient missed any medications? <input type="checkbox"/> Yes <input type="checkbox"/> No<br><input type="checkbox"/> ARVS <input type="checkbox"/> PCP Prophylaxis <input type="checkbox"/> TB Prophylaxis <input type="checkbox"/> Anti-TB Medication<br>Drug(s) Missed: _____ Reason: _____                                                                                                                                                                                                                                                                                                                                                                                                                                                                                                                                                                                                                                                                                                                                                                                                                                                                                                                                                                                                                                                                                                                                                                                                                                               |  |                                                                                                                                                                                                                                                                                                                                                                                                                                                                                                                                                                                                                                                                                                                                |  |                                                                                                                                                                                                                                                                                                                                                                                                                                                                                           |
| 16c. During the last seven days how many of his/her pills did the patient take?<br><input type="checkbox"/> ARVS: <input type="checkbox"/> None <input type="checkbox"/> Few <input type="checkbox"/> Half <input type="checkbox"/> Most <input type="checkbox"/> All Drug(s) missed _____<br><input type="checkbox"/> PCP Prophylaxis: <input type="checkbox"/> None <input type="checkbox"/> Few <input type="checkbox"/> Half <input type="checkbox"/> Most <input type="checkbox"/> All Drug(s) missed _____<br><input type="checkbox"/> TB Prophylaxis: <input type="checkbox"/> None <input type="checkbox"/> Few <input type="checkbox"/> Half <input type="checkbox"/> Most <input type="checkbox"/> All Drug(s) missed _____<br><input type="checkbox"/> Anti-TB Medication: <input type="checkbox"/> None <input type="checkbox"/> Few <input type="checkbox"/> Half <input type="checkbox"/> Most <input type="checkbox"/> All Drug(s) missed _____                                                                                                                                                                                                                                                                                                                                                                                                                                                                                                                                                                                                                 |  |                                                                                                                                                                                                                                                                                                                                                                                                                                                                                                                                                                                                                                                                                                                                |  |                                                                                                                                                                                                                                                                                                                                                                                                                                                                                           |
| Reasons for missing pills in the last 7 days: _____                                                                                                                                                                                                                                                                                                                                                                                                                                                                                                                                                                                                                                                                                                                                                                                                                                                                                                                                                                                                                                                                                                                                                                                                                                                                                                                                                                                                                                                                                                                            |  |                                                                                                                                                                                                                                                                                                                                                                                                                                                                                                                                                                                                                                                                                                                                |  |                                                                                                                                                                                                                                                                                                                                                                                                                                                                                           |
| 17. Does the patient have any interval complaints? <input type="checkbox"/> Yes <input type="checkbox"/> No                                                                                                                                                                                                                                                                                                                                                                                                                                                                                                                                                                                                                                                                                                                                                                                                                                                                                                                                                                                                                                                                                                                                                                                                                                                                                                                                                                                                                                                                    |  |                                                                                                                                                                                                                                                                                                                                                                                                                                                                                                                                                                                                                                                                                                                                |  |                                                                                                                                                                                                                                                                                                                                                                                                                                                                                           |
| <input type="checkbox"/> Diarrhea: <input type="checkbox"/> days <input type="checkbox"/> weeks <input type="checkbox"/> Months <input type="checkbox"/> continuous                                                                                                                                                                                                                                                                                                                                                                                                                                                                                                                                                                                                                                                                                                                                                                                                                                                                                                                                                                                                                                                                                                                                                                                                                                                                                                                                                                                                            |  | <input type="checkbox"/> Vomiting: <input type="checkbox"/> days <input type="checkbox"/> weeks <input type="checkbox"/> Months <input type="checkbox"/> Continuous                                                                                                                                                                                                                                                                                                                                                                                                                                                                                                                                                            |  |                                                                                                                                                                                                                                                                                                                                                                                                                                                                                           |
| <input type="checkbox"/> Abdominal pain: <input type="checkbox"/> days <input type="checkbox"/> weeks <input type="checkbox"/> Months <input type="checkbox"/> Continuous                                                                                                                                                                                                                                                                                                                                                                                                                                                                                                                                                                                                                                                                                                                                                                                                                                                                                                                                                                                                                                                                                                                                                                                                                                                                                                                                                                                                      |  | <input type="checkbox"/> Cough: <input type="checkbox"/> days <input type="checkbox"/> weeks <input type="checkbox"/> Months <input type="checkbox"/> Continuous                                                                                                                                                                                                                                                                                                                                                                                                                                                                                                                                                               |  |                                                                                                                                                                                                                                                                                                                                                                                                                                                                                           |
| <input type="checkbox"/> Difficulty breathing: <input type="checkbox"/> days <input type="checkbox"/> weeks <input type="checkbox"/> Months <input type="checkbox"/> Continuous                                                                                                                                                                                                                                                                                                                                                                                                                                                                                                                                                                                                                                                                                                                                                                                                                                                                                                                                                                                                                                                                                                                                                                                                                                                                                                                                                                                                |  | <input type="checkbox"/> Fever: <input type="checkbox"/> days <input type="checkbox"/> weeks <input type="checkbox"/> Months <input type="checkbox"/> Continuous                                                                                                                                                                                                                                                                                                                                                                                                                                                                                                                                                               |  |                                                                                                                                                                                                                                                                                                                                                                                                                                                                                           |
| <input type="checkbox"/> Sore throat: <input type="checkbox"/> days <input type="checkbox"/> weeks <input type="checkbox"/> Months <input type="checkbox"/> Continuous                                                                                                                                                                                                                                                                                                                                                                                                                                                                                                                                                                                                                                                                                                                                                                                                                                                                                                                                                                                                                                                                                                                                                                                                                                                                                                                                                                                                         |  | <input type="checkbox"/> Ear discharge: <input type="checkbox"/> days <input type="checkbox"/> weeks <input type="checkbox"/> Months <input type="checkbox"/> Continuous                                                                                                                                                                                                                                                                                                                                                                                                                                                                                                                                                       |  |                                                                                                                                                                                                                                                                                                                                                                                                                                                                                           |
| <input type="checkbox"/> Skin rash: <input type="checkbox"/> days <input type="checkbox"/> weeks <input type="checkbox"/> Months <input type="checkbox"/> Continuous                                                                                                                                                                                                                                                                                                                                                                                                                                                                                                                                                                                                                                                                                                                                                                                                                                                                                                                                                                                                                                                                                                                                                                                                                                                                                                                                                                                                           |  | <input type="checkbox"/> Swelling( specify) _____ <input type="checkbox"/> days <input type="checkbox"/> weeks                                                                                                                                                                                                                                                                                                                                                                                                                                                                                                                                                                                                                 |  |                                                                                                                                                                                                                                                                                                                                                                                                                                                                                           |
| <input type="checkbox"/> Other (specify) _____ <input type="checkbox"/> days <input type="checkbox"/> weeks                                                                                                                                                                                                                                                                                                                                                                                                                                                                                                                                                                                                                                                                                                                                                                                                                                                                                                                                                                                                                                                                                                                                                                                                                                                                                                                                                                                                                                                                    |  | <input type="checkbox"/> Other (specify) _____ <input type="checkbox"/> days <input type="checkbox"/> weeks                                                                                                                                                                                                                                                                                                                                                                                                                                                                                                                                                                                                                    |  |                                                                                                                                                                                                                                                                                                                                                                                                                                                                                           |
| Comments: _____                                                                                                                                                                                                                                                                                                                                                                                                                                                                                                                                                                                                                                                                                                                                                                                                                                                                                                                                                                                                                                                                                                                                                                                                                                                                                                                                                                                                                                                                                                                                                                |  |                                                                                                                                                                                                                                                                                                                                                                                                                                                                                                                                                                                                                                                                                                                                |  |                                                                                                                                                                                                                                                                                                                                                                                                                                                                                           |
| 18. Physical Exam:                                                                                                                                                                                                                                                                                                                                                                                                                                                                                                                                                                                                                                                                                                                                                                                                                                                                                                                                                                                                                                                                                                                                                                                                                                                                                                                                                                                                                                                                                                                                                             |  |                                                                                                                                                                                                                                                                                                                                                                                                                                                                                                                                                                                                                                                                                                                                |  |                                                                                                                                                                                                                                                                                                                                                                                                                                                                                           |
| Vitals: RR: _____ P: _____ Temp: _____ Weight: _____ Height: _____ Head Circ: _____ (if < 2 yrs) BSA: _____ SaO <sub>2</sub> : _____                                                                                                                                                                                                                                                                                                                                                                                                                                                                                                                                                                                                                                                                                                                                                                                                                                                                                                                                                                                                                                                                                                                                                                                                                                                                                                                                                                                                                                           |  |                                                                                                                                                                                                                                                                                                                                                                                                                                                                                                                                                                                                                                                                                                                                |  |                                                                                                                                                                                                                                                                                                                                                                                                                                                                                           |
| General: <input type="checkbox"/> Jaundice <input type="checkbox"/> Pale <input type="checkbox"/> Adenopathy <input type="checkbox"/> Edema <input type="checkbox"/> Thrush <input type="checkbox"/> Kaposi <input type="checkbox"/> Rash <input type="checkbox"/> Parotid enlargement                                                                                                                                                                                                                                                                                                                                                                                                                                                                                                                                                                                                                                                                                                                                                                                                                                                                                                                                                                                                                                                                                                                                                                                                                                                                                         |  |                                                                                                                                                                                                                                                                                                                                                                                                                                                                                                                                                                                                                                                                                                                                |  |                                                                                                                                                                                                                                                                                                                                                                                                                                                                                           |
| RS: <input type="checkbox"/> Normal <input type="checkbox"/> Abnormal                                                                                                                                                                                                                                                                                                                                                                                                                                                                                                                                                                                                                                                                                                                                                                                                                                                                                                                                                                                                                                                                                                                                                                                                                                                                                                                                                                                                                                                                                                          |  | CNS: <input type="checkbox"/> Normal <input type="checkbox"/> Abnormal                                                                                                                                                                                                                                                                                                                                                                                                                                                                                                                                                                                                                                                         |  | CVS: <input type="checkbox"/> Normal <input type="checkbox"/> Abnormal                                                                                                                                                                                                                                                                                                                                                                                                                    |
| MS: <input type="checkbox"/> Normal <input type="checkbox"/> Abnormal                                                                                                                                                                                                                                                                                                                                                                                                                                                                                                                                                                                                                                                                                                                                                                                                                                                                                                                                                                                                                                                                                                                                                                                                                                                                                                                                                                                                                                                                                                          |  | PA: <input type="checkbox"/> Normal <input type="checkbox"/> Abnormal                                                                                                                                                                                                                                                                                                                                                                                                                                                                                                                                                                                                                                                          |  | HEENT: <input type="checkbox"/> Normal <input type="checkbox"/> Abnormal                                                                                                                                                                                                                                                                                                                                                                                                                  |
| Exam Notes: _____                                                                                                                                                                                                                                                                                                                                                                                                                                                                                                                                                                                                                                                                                                                                                                                                                                                                                                                                                                                                                                                                                                                                                                                                                                                                                                                                                                                                                                                                                                                                                              |  |                                                                                                                                                                                                                                                                                                                                                                                                                                                                                                                                                                                                                                                                                                                                |  |                                                                                                                                                                                                                                                                                                                                                                                                                                                                                           |

**19. Test Results:** (Please record date test was drawn, rather than date test was run)

| Test                      | Result | Test Date | Test                                                                  | Result | Test Date |
|---------------------------|--------|-----------|-----------------------------------------------------------------------|--------|-----------|
| WBC/mm <sup>3</sup>       |        |           | CD4                                                                   |        |           |
| Hgb g/dL                  |        |           | CD8                                                                   |        |           |
| MCV                       |        |           | CD4%                                                                  |        |           |
| Platelets/mm <sup>3</sup> |        |           | HIV Long Elisa                                                        |        |           |
| ALC/mm <sup>3</sup>       |        |           | HIV DNA PCR                                                           |        |           |
| SGPT                      |        |           | Viral Load                                                            |        |           |
| Creat mmol/L              |        |           | Other:                                                                |        |           |
| CXR:                      | Code:  |           | Codes: 0-normal 1-PI Effusion 2-Infiltrate 3-Miliary                  |        |           |
|                           |        |           | 4-Diffuse abn/non-miliary 5-Cavity 6-Cardiomegaly 7-Other abnormality |        |           |

**20. Current Pediatric Staging:**

CDC Class:  N  A  B  C Criteria \_\_\_\_\_ New Stage  Yes  No  
WHO Stage:  1  2  3  4 Criteria \_\_\_\_\_ New Stage  Yes  No  
Not-applicable:  HIV negative  HIV Exposed, status indeterminate

**Tuberculosis:**

21a. Household member diagnosed with TB?  Yes  No  
21b. Has the patient been diagnosed with TB since the last visit  
 Yes  No  
21c. Have you diagnosed this child with TB today?  
 Yes  No  Already on anti-TB

21d. If diagnosed, TB Diagnosis was done on basis of:  
 Household contact  Chronic cough (> 2 weeks)  
 FTT/weight loss  Persistent fever  
 Suggestive CXR  AAFB positive  
 TST positive \* Keith Jones score \_\_\_\_\_  Other (specify): \_\_\_\_\_  
\* Edward Keith score \_\_\_\_\_ \* (Refer to the manual)

**22. ARV Side-effects/Toxicity:** Any side-effects attributable to ARV since the last visit?  Yes  No  
If yes, tick all that apply:  Rash  Anemia  Lipo-dystrophy  Hepatitis  Neuropathy  IRIS  Steven-Johnson syndrome  
 Lactic Acidosis  Diarrhoea  Persistent Vomiting  Other (specify): \_\_\_\_\_

**23. Diagnosis:** New Diagnosis (\* Tick "Add" to add to summary sheet. Tick "Remove" to delete to from summary sheet)

| Diagnosis | New                      | Ongoing                  | Resolved                 | Diagnosis | New                      | Ongoing                  | Resolved                 |
|-----------|--------------------------|--------------------------|--------------------------|-----------|--------------------------|--------------------------|--------------------------|
| 1.        | <input type="checkbox"/> | <input type="checkbox"/> | <input type="checkbox"/> | 3.        | <input type="checkbox"/> | <input type="checkbox"/> | <input type="checkbox"/> |
| 2.        | <input type="checkbox"/> | <input type="checkbox"/> | <input type="checkbox"/> | 4.        | <input type="checkbox"/> | <input type="checkbox"/> | <input type="checkbox"/> |

**24. Plan:**

24a. ARVs:  None  Start ARVs  Continue Regimen  Change Formulation  Change Regimen  Re-dose  Stop All  
Reason for stop/change/re-dose:  Failure  Toxicity (Specify) \_\_\_\_\_  Weight Change  Other \_\_\_\_\_  
If start or change or re-dose, tick new regimen:  
 3TC (4mg/kg):  Syrup \_\_\_\_\_ mg \_\_\_\_\_ ml  Tabs \_\_\_\_\_ mg  Kaletra (0.125ml/kg):  Syrup \_\_\_\_\_ mg \_\_\_\_\_ ml  Tabs \_\_\_\_\_ mg  
 d4T (1mg/kg):  Syrup \_\_\_\_\_ mg \_\_\_\_\_ ml  Tabs \_\_\_\_\_ mg  ABC (8mg/kg):  Syrup \_\_\_\_\_ mg \_\_\_\_\_ ml  Tabs \_\_\_\_\_ mg  
 AZT: (180mg/m2):  Syrup \_\_\_\_\_ mg \_\_\_\_\_ ml  Tabs \_\_\_\_\_ mg  DDI (100mg/m2):  Syrup \_\_\_\_\_ mg \_\_\_\_\_ ml  Tabs \_\_\_\_\_ mg  
 NVP:  Syrup \_\_\_\_\_ mg \_\_\_\_\_ ml  Tabs \_\_\_\_\_ mg  Nelfinavir:  Powder \_\_\_\_\_ mg  Tabs \_\_\_\_\_ mg  
 EFV:  Syrup \_\_\_\_\_ mg \_\_\_\_\_ ml  Tabs \_\_\_\_\_ mg  Other: \_\_\_\_\_

24b. PCP Prophylaxis:  None  Start  Continue Regimen  Change Regimen  Re-dose  Stop  
Reason for stop/change/re-dose:  Failure  Toxicity (Specify) \_\_\_\_\_  Weight Change  Other \_\_\_\_\_  
New Drugs:  Septrin \_\_\_\_\_ tabs/day or \_\_\_\_\_ ml/day  Dapsone \_\_\_\_\_ mg/day

24c. TB Prophylaxis:  None  Start INH  Continue INH  Re-dose  Stop INH  
Reason for stop/change/re-dose:  Completed  Toxicity (Specify) \_\_\_\_\_  Active TB  
 Weight Change  Other \_\_\_\_\_ Drug Dose:  INH \_\_\_\_\_ mg/day

24d. TB Treatment:  None  Start Induction  Change to Continuation  Continue Regimen  Re-dose  Stop  
Reason for stop/change/re-dose:  Completed  Toxicity (Specify) \_\_\_\_\_  Weight Change  Other \_\_\_\_\_  
New Drugs:  Rifater \_\_\_\_\_ tabs/day  Rifinah \_\_\_\_\_ tabs/day  Rifafour \_\_\_\_\_ tabs/day  Ethambutol \_\_\_\_\_ mg/day  
 Streptomycin \_\_\_\_\_ mg  Rifampicin \_\_\_\_\_ mg  INH \_\_\_\_\_ mg  Pyrazinamide \_\_\_\_\_ mg

24e. Immunizations Ordered Today:  None  
Pentavalent Vaccine  HIB Dose#:  1  2  3  BCG  
 DPT Dose#:  1  2  3  Measles Dose#:  1  
 HEP B Dose#:  1  2  3  Polio Dose#:  1  2  3  4

24f. Feeding plan:  Breast  Expressed Breast milk  Formula  Cow's/Animal milk  
 Other liquids (Uji, tea, soup, juice)  Solid food (ugali, potatoes, bananas)  
If this is a change, reason for change:  Age  Affordability  Intolerance  Other (Specify): \_\_\_\_\_

24g. Other Drugs Started or Re-dosed at this Visit:

| Drug | Dose | Freq & Duration | New                      | DoseΔ                    |
|------|------|-----------------|--------------------------|--------------------------|
| 1.   |      |                 | <input type="checkbox"/> | <input type="checkbox"/> |
| 2.   |      |                 | <input type="checkbox"/> | <input type="checkbox"/> |
| 3.   |      |                 | <input type="checkbox"/> | <input type="checkbox"/> |

**25. Tests Ordered:**

Full Haemogram  Hgb  SGPT  CD4 Panel  Viral Load  
 HIV Elisa  HIV DNA PCR  Creatinine  CXR  Other (Specify): \_\_\_\_\_

**26. Referrals:**

None  TB treatment/DOT program  Adherence Counseling  Nutritional support  Mental Health Services  
 Psychosocial counseling  Social Support Services  Disclosure Counseling  OVC  Express care  
 Inpatient care/Hospitalization: ( MTRH  Health Center  Other \_\_\_\_\_ )  Other referral (specify): \_\_\_\_\_

Additional Comments:  
Return to Clinic: Weeks \_\_\_\_\_ Months \_\_\_\_\_ Date \_\_\_\_\_ CO/Physician: \_\_\_\_\_ Provider #: \_\_\_\_\_  
 HIV Negative, Discontinue from Clinic Nurse: \_\_\_\_\_ Provider #: \_\_\_\_\_  
 Transfer care to other centre: \_\_\_\_\_  
 AMPATH  non-AMPATH TO: \_\_\_\_\_ Pediatric Return Version 4.5 16<sup>th</sup> March, 2009

2



## APPENDIX C

### Details of Statistical Analysis Methods Used for Primary Outcome

We consider a discrete survival model for the analysis of the probability of completing an overdue task. First, we consider the probability of completing the overdue task at the initial visit to be  $\Phi(\alpha_1 + \gamma)$  in the control arm and  $\Phi(\beta_1 + \gamma)$  in the intervention arm. Here,  $\Phi(g)$  is the cumulative distribution function of a standard normal variable,  $(\alpha_1, \beta_1)$  are fixed model parameters, and  $\gamma$  represents the random effect due to the specific health care provider on that visit. Conditional on the fact that the overdue task was

not completed at visit  $k - 1$  ( $k \geq 2$ ), the probability of completing the overdue task at visit  $k$  is  $\Phi(\alpha_k + \gamma)$  and  $\Phi(\beta_k + \gamma)$  for the control and intervention arm, respectively. Setting the random effect  $\gamma$  to follow a normal distribution with mean 0 and variance  $\sigma^2$ , we fitted such a model by using SAS PROC GLIMMIX. In our model-fitting process, we found that a parsimonious model with  $\alpha_k = \alpha_3$  and  $\beta_k = \beta_3$  ( $k > 3$ ) is sufficient to fit the data. Therefore, this model is used to compare the intervention and control arms.

The null hypothesis that the intervention is not effective in improving completion of overdue tasks is translated to the following hypothesis in terms of the model described above:

$$H_0 : \alpha_k = \beta_k, k=1, 2, 3.$$

The  $P$  values in Table 3 are based on the Wald test of the  $H_0$ . The cumulative rate of correcting overdue task (CR( $k$ )) by visit  $k$  for the control arm is calculated based on the following formula:

$$\text{CR}(k) = 1 - \int_{-\infty}^{\infty} \Phi(-\hat{\alpha}_1 + \gamma) \Phi(-\hat{\alpha}_2 + \gamma) \dots \Phi(-\hat{\alpha}_k + \gamma) (1/\hat{\sigma}) \phi(\gamma/\hat{\sigma}) d\gamma$$

where  $\hat{\alpha}_1, \hat{\alpha}_2, \dots, \hat{\alpha}_k$  and  $\hat{\sigma}$  are parameter estimates and  $\phi(g)$  is the probability density function of a standard normal variable. CR( $k$ ) for the intervention arm can be similarly calculated with  $\hat{\alpha}_j$  replaced by  $\hat{\beta}_j$  ( $j=1, 2, \dots, k$ ).
